# Supplementary material for: Soil mixture composition alters Arabidopsis susceptibility to Pseudomonas syringae infection
Source: PubMed Central journal article supplement (PMC6508533; doi:10.1002/pld3.44), 2018-02-19
Supplement: PLD3-2-e00044-s001.pdf [file PLD3-2-e00044-s001.pdf]

Reviewer Comments:

Reviewer #2:

Comments to the Author (Required):

I appreciate the thoughtful and thorough response. The changes made to the manuscript addressed all of my questions / concerns.
